# Supplementary material for: Synucleinopathy-like Clinical Features and Biologically Defined Synucleinopathy in Psp-parkinsonism: An Imperfect Match
Source: Research Square preprint supplement (doi:10.21203/rs.3.rs-8470662/v1), 2026-01-16
Supplement: Supplementary file 1 [file 2f3b44c2b4b833105f5e5abc.docx]

**Postmortem neuropathological assessment**

Neuropathological examination was performed according to standardized protocols at the Banc de Teixits Neurològics. Half brain hemisphere was dissected in coronal sections and frozen while the other half was fixed by immersion in 4% formalin for 3 weeks. At least 25 representative brain areas were embedded in paraffin, cut at 5 µm and stained with hematoxylin & eosin. Immunohistochemistry (IHC) was performed using various antibodies including anti-βA4 (6F/3D, Dako, Glostrup, Denmark), anti-tau (AT8, Thermo Scientific, USA), anti asyn (5G4, Analytik Jena, Germany), anti-ubiquitin (P4D1, Cell signalling, USA), anti-α-internexin (2E3, Invitrogen, USA), and anti phospho TDP43 (11-9, Cosmo bio co, Japan). All IHQ were counterstained with hematoxylin. The usual references for diagnosis and staging are compiled in a recent publication.1 Specifically, for progressive supranuclear palsy we used the staging by Kovacs et al.,2 for Parkinson’s disease the Braak staging system,3 for Alzheimer’s disease the ABC score proposed by the National Insititute on Aging-Alzheimer´s Association4 and for the limbic-predominant age-related TDP-43 the LATE staging.5

**REFERENCES**

1. Aldecoa I, Barroeta I, Carroll SL, et al. Down Syndrome Biobank Consortium: A perspective. *Alzheimers Dement*. 2024;20(3):2262-2272.
2. Kovacs GG, Lukic MJ, Irwin DJ, et al. Distribution patterns of tau pathology in progressive supranuclear palsy. *Acta Neuropathol*. 2020;140(2):99-119.
3. Braak H, Del Tredici K, Rüb U, de Vos RA, Jansen Steur EN, Braak E. Staging of brain pathology related to sporadic Parkinson's disease. *Neurobiol Aging*. 2003;24(2):197-211.
4. Montine TJ, Phelps CH, Beach TG, et al. National Institute on Aging-Alzheimer's Association guidelines for the neuropathologic assessment of Alzheimer's disease: a practical approach. *Acta Neuropathol*. 2012;123(1):1-11.
5. Nelson PT, Lee EB, Cykowski MD, et al. LATE-NC staging in routine neuropathologic diagnosis: an update. *Acta Neuropathol*. 2023;145(2):159-173.
