# Supplementary material for: Synucleinopathy-like Clinical Features and Biologically Defined Synucleinopathy in Psp-parkinsonism: An Imperfect Match
Source: Research Square preprint supplement (doi:10.21203/rs.3.rs-8470662/v1), 2026-01-16
Supplement: Supplementary file 2 [file df4ee3899d04b5cb307383e4.docx]

**Suppl. Table 1. Agreement between subjective and UPSIT-defined hyposmia by diagnostic group**

| **Variable** | **CS (20)** | **PD (20)** | **PSP-P (20)** | **PSP-RS (20)** |
| --- | --- | --- | --- | --- |
| **Overall agreement (%)** | 90.0 | 70.0 | 70.0 | 55.0 |
| **Expected agreement (%)** | 81.5 | 67.5 | 52.5 | 47.0 |
| **Kappa (SE)** | 0.46 (0.19) | 0.08 (0.21) | 0.37 (0.20) | 0.15 (0.20) |
| **p-value** | 0.007 | 0.359 | 0.035 | 0.222 |
| **True Positive (Both subjective & objective)** | 1 | 13 | 10 | 5 |
| **False Negative (Objective only)** | 2 | 4 | 5 | 7 |
| **False Positive (Subjective only)** | 0 | 2 | 1 | 2 |
| **True Negative (Neither)** | 17 | 1 | 4 | 6 |

In the PSP-P group, agreement between subjective and UPSIT-defined hyposmia was moderate, with 70.0% overall agreement (expected 52.5%) and a kappa of 0.37 (SE 0.20, p=0.035). Ten PSP-P patients had both subjective and UPSIT-defined hyposmia, five had UPSIT-defined hyposmia without subjective awareness, one reported hyposmia despite normal UPSIT, and four had normal olfactory function without complaint.

Among PSP-RS (n=20), agreement between subjective and UPSIT-defined hyposmia was low, with 55.0% overall agreement (expected 47.0%) and a kappa of 0.15 (SE 0.20, p=0.222). Five PSP-RS patients had both subjective and UPSIT-defined hyposmia, seven had UPSIT-defined hyposmia without subjective awareness, two reported hyposmia despite normal UPSIT, and six had normal olfactory function without complaint.

Among PD (n=20), agreement between subjective and UPSIT-defined hyposmia was low, with 70.0% overall agreement (expected 67.5%) and a very low kappa of 0.08 (SE 0.21, p=0.359). Thirteen PD patients had both subjective and UPSIT-defined hyposmia, four had UPSIT-defined hyposmia without subjective awareness, two reported hyposmia despite normal UPSIT, and one had normal olfactory function without complaint.

Among CS (n=20), agreement between subjective and UPSIT-defined hyposmia was high, with 90.0% overall agreement (expected 81.5%) and a moderate kappa of 0.46 (SE 0.19, p=0.007). Seventeen CS had normal olfactory function on the UPSIT and did not report hyposmia, one had both subjective and UPSIT-defined hyposmia, another reported hyposmia despite normal UPSIT and 2 had UPSIT-defined hyposmia without subjective awareness.

**Suppl. Table 2. Univariate logistic regression models (PD vs. PSP all variants)**

| **PSP vs. PD** |  |  |  |  |  |
| --- | --- | --- | --- | --- | --- |
| **Variable** | **OR** | **95% CI OR** | **p** | **AUC** | **95% CI AUC** |
| Sex | 1.11 | 0.37 – 3.31 | 0.853 | 0.513 | 0.378 – 0.647 |
| Age | 1.02 | 0.94 – 1.10 | 0.701 | 0.521 | 0.354 – 0.688 |
| MoCA | 1.08 | 0.92 – 1.27 | 0.322 | 0.595 | 0.435 – 0.755 |
| UPSIT | 0.91 | 0.84 – 0.99 | **0.032** | 0.300 | 0.157 – 0.443 |
| UPSIT ≤15th % | 2.73 | 0.68 – 11.00 | 0.158 | 0.588 | 0.479 – 0.696 |
| Orthostatism | 12.67 | 2.36 – 67.96 | **0.003** | 0.675 | 0.560 – 0.790 |
| *fRBD* | 4.00 | 1.24 – 12.89 | **0.020** | 0.650 | 0.521 – 0.779 |
| *inRBD* | 0.71 | 0.17 – 3.01 | 0.638 | 0.475 | 0.373 – 0.577 |
| total RBD | 2.79 | 0.91 – 8.50 | 0.072 | 0.625 | 0.493 – 0.757 |
| RBD probable premotor | 11.20 | 1.75 – 71.64 | **0.011** | 0.745 | 0.584 – 0.906 |
| RBD probable postmotor | 0.09 | 0.014 – 0.57 | **0.011** | 0.255 | 0.094 – 0.416 |

*CSF asyn-SAA: Cerebrospinal fluid α-synuclein analysed using a seed amplification assay; fRBD: full REM sleep behaviour disorder; inRBD: incomplete REM sleep behaviour disorder; MoCA: Montreal Cognitive Assessment; UPSIT: University of Pennsylvania Smell Identification Test.***Suppl. Table 3. Univariate logistic regression models (PD vs. PSP-P)**

| Variable | OR | 95% CI OR | p | AUC | 95% CI AUC |
| --- | --- | --- | --- | --- | --- |
| Sex | 1.23 | 0.35 – 4.31 | 0.749 | 0.525 | 0.368 – 0.682 |
| Age | 1.04 | 0.95 – 1.13 | 0.398 | 0.546 | 0.360 – 0.732 |
| MoCA | 0.96 | 0.80 – 1.17 | 0.699 | 0.505 | 0.321 – 0.689 |
| UPSIT | 0.94 | 0.86 – 1.02 | 0.125 | 0.361 | 0.184 – 0.538 |
| UPSIT ≤15th % | 1.89 | 0.38 – 9.27 | 0.433 | 0.550 | 0.424 – 0.676 |
| Orthostatism | —* | — | — | 0.700 | 0.590 – 0.810 |
| *fRBD* | 4.00 | 0.98 – 16.3 | 0.053 | 0.650 | 0.506 – 0.794 |
| *inRBD* | 0.53 | 0.11 – 2.60 | 0.433 | 0.450 | 0.324 – 0.576 |
| total RBD | 2.27 | 0.64 – 8.11 | 0.207 | 0.600 | 0.445 – 0.755 |
| Premotor probable RBD | 12.8 | 1.21 – 135.6 | **0.034** | 0.752 | 0.578 – 0.928 |
| Postmotor probable RBD | 0.08 | 0.007 – 0.83 | **0.034** | 0.248 | 0.072 – 0.423 |
| CSF asyn-SAA | —* | — | — |  |  |

*CSF asyn-SAA: Cerebrospinal fluid α-synuclein analysed using a seed amplification assay; fRBD: full REM sleep behaviour disorder; inRBD: incomplete REM sleep behaviour disorder; MoCA: Montreal Cognitive Assessment; UPSIT: University of Pennsylvania Smell Identification Test.*

* Orthostatism and CSF asyn-SAA dropped from regression due to perfect prediction.

**Suppl. Table 4. Univariate logistic regression models (PSP-RS vs. PSP-P)**

| Variable | OR | 95% CI OR | p | AUC | 95% CI AUC |
| --- | --- | --- | --- | --- | --- |
| Sex | 1.23 | 0.35 – 4.31 | 0.749 | 0.525 | 0.368 – 0.682 |
| Age | 1.06 | 0.96 – 1.17 | 0.251 | 0.609 | 0.423 – 0.794 |
| MoCA | 0.76 | 0.61 – 0.95 | **0.016** | 0.269 | 0.109 – 0.428 |
| UPSIT | 1.03 | 0.97 – 1.10 | 0.356 | 0.614 | 0.435 – 0.792 |
| UPSIT ≤15th % | 0.50 | 0.13 – 1.93 | 0.315 | 0.425 | 0.278 – 0.572 |
| Orthostatism | —* | — | — |  |  |
| *fRBD* | 1.00 | 0.21 – 4.71 | 1.000 | 0.500 | 0.373 – 0.627 |
| *inRBD* | 0.53 | 0.11 – 2.60 | 0.433 | 0.450 | 0.324 – 0.576 |
| totalRBD | 0.66 | 0.18 – 2.35 | 0.519 | 0.450 | 0.295 – 0.605 |
| Premotor probable RBD | 1.33 | 0.07 – 25.9 | 0.849 | 0.516 | 0.339 – 0.693 |
| Postmotor probable RBD | 0.75 | 0.04 – 14.6 | 0.849 | 0.484 | 0.307 – 0.661 |
| CSF asyn-SAA | —* | — | — | — | — |

*CSF asyn-SAA: Cerebrospinal fluid α-synuclein analysed using a seed amplification assay; fRBD: full REM sleep behaviour disorder; inRBD: incomplete REM sleep behaviour disorder; MoCA: Montreal Cognitive Assessment; UPSIT: University of Pennsylvania Smell Identification Test.*

* Orthostatism and CSF asyn-SAA dropped from regression due to perfect prediction.

**Supplementary Figure 1. Epworth Sleepiness Scale scores by item**

Median scores for each item of the Epworth Sleepiness Scale are shown for all study groups. There was less sleepiness in PSP-RS in one of the most passive situations (lying down to rest).

*PD: Parkinson’s disease; PSP: progressive supranuclear palsy; PSP-P: PSP-parkinsonism; PSP-RS: PSP-Richardson’s syndrome.*

**Supplementary Figure 2. Comparison of PSQI components between groups**

Comparison of the seven components of the Pittsburgh Sleep Quality Index (PSQI): A. Sleep quality, B. Sleep latency, C. Sleep duration, D. Sleep efficiency, E. Sleep disturbances, F. Use of sleep medication, and G. Daytime dysfunction—across groups using the Kruskal-Wallis test. p-values were adjusted by FDR.


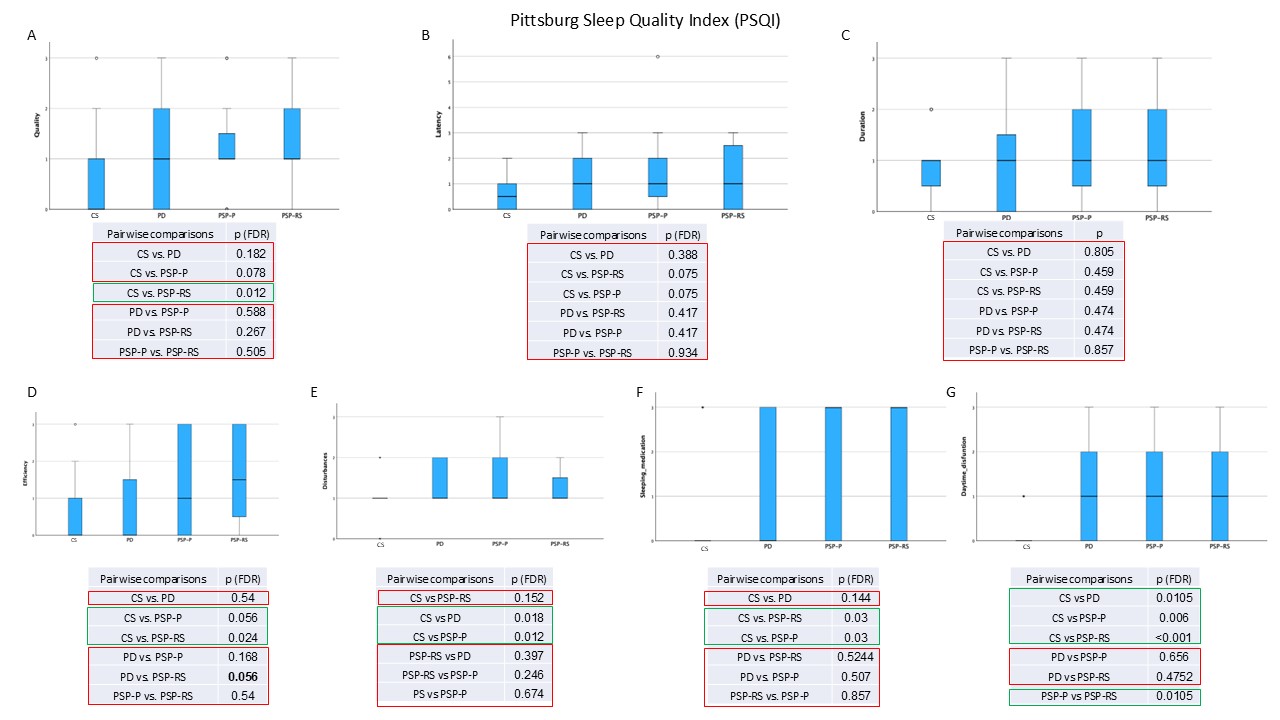


*CS: control subjects; p-FDR: p-values adjusted for False Discovery Rate; PD: Parkinson’s disease; PSP: progressive supranuclear palsy; PSP-P: PSP-parkinsonism; PSP-RS: PSP-Richardson’s syndrome.*

**Supplementary Figure 3. Comparison of SCOPA-AUT domains between groups**

Comparation of the domains of the Scale for Outcomes in Parkinson’s Disease - Autonomic **(**SCOPA-AUT): A. Gastrointestinal, B. Urinary, C. Cardiovascular, D. Pupillomotor, E. Thermoregulatory, and F. Sexual - across groups using the Kruskal–Wallis test. P-values were corrected by FDR.

*
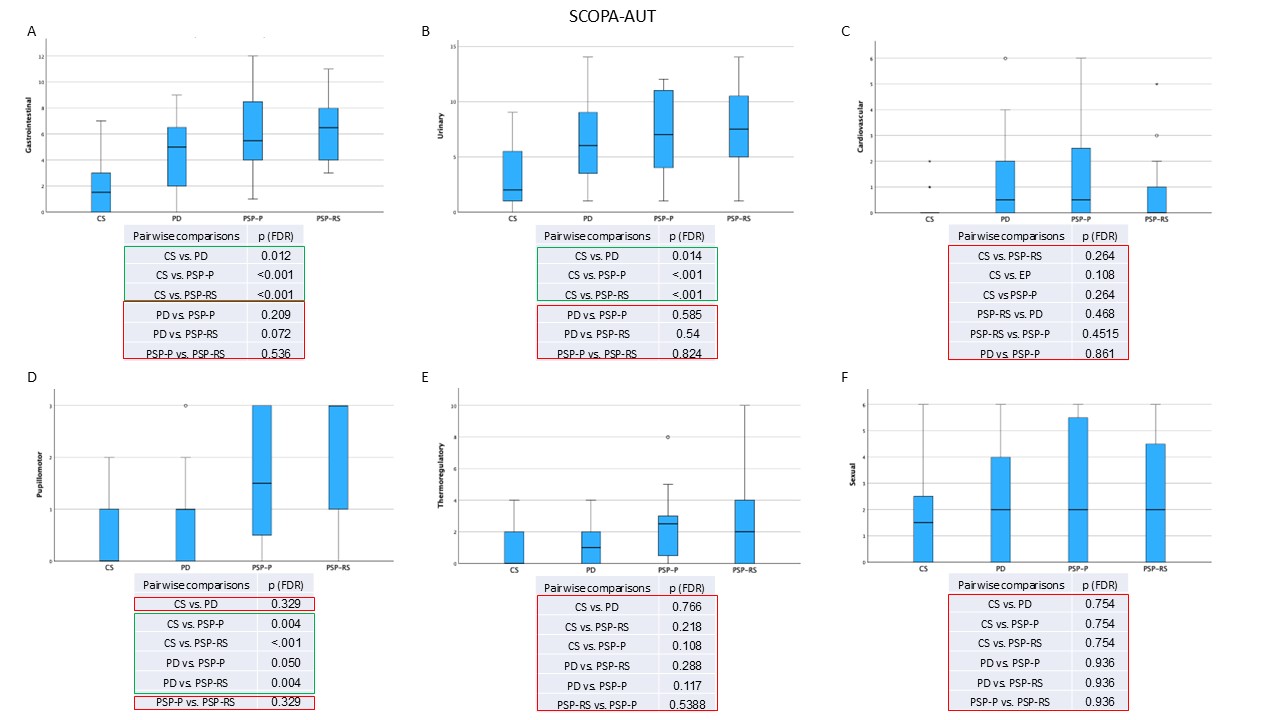
*

*CS: control subjects; p-FDR: p-values adjusted for False Discovery Rate; PD: Parkinson’s disease; PSP: progressive supranuclear palsy; PSP-P: PSP-parkinsonism; PSP-RS: PSP-Richardson’s syndrome.*
